# Supplementary material
Source: publisher figshare collection journal article supplement (https://gsapubs.figshare.com/ndownloader/files/22885478)
Supplement: Supplementary file 1 [file 22885478]

## Sheet: Suppl. Table 2
	Supplemental Table S2
	Fan	River	Station	GRDC Code	Data Type	Location on fan	Latitude	Longitude	Hydroclimate	DA	Data Year Start	Data Year End	Qpeak	Qmax/Q10	Qmax/Qmean	DVIa	DVIy	Q99.863/Q50	CVQp
	Nevada01	AMARGOSA	NEAR BEATTY, NV	10251220	Daily	Apex	36.8672	-116.761	Arid	1217.29	1963	1968	9.06805	nan	1236.28	9.06805	317.478	nan	1.92954
	California03	AMARGOSA	TECOPA, CA	4118320	Daily	Upstream of apex	35.8486	-116.23	Arid	8003.1	1961	2017	3.0128	nan	443.882	2.97916	55.9348	2007.71	1.77682
	Oman04	AWABI	NEAR AWABI	2124200	Daily	Upstream of apex	23.2964	57.5286	Arid	254	1984	2002	2.95408	nan	426.828	2.92925	134.08	nan	0.960357
	Chad03	BAHR AZOUM	AM-TIMAN	1537800	Monthly	Mid fan	11.03	20.28	Arid	80000	1953	1976	5.59393	nan	nan	5.59393	nan	nan	0.542868
	Afghanistan01	BALKH	RABAT-I-BALA	2218450	Daily	Apex	36.5833	66.9667	Arid	18035	1964	1978	2.04908	6	1.83974	1.34989	3.41817	1.71429	0.580717
	Kazakhstan09	BAZARKA	BAZAR	2911537	Monthly	Apex	47.8	82.3	Cold and polar	1530	1936	1987	3.66755	71.8182	nan	3.55118	nan	nan	0.561199
	Bolivia12	BENI	ANGOSTO DEL BALA	3716400	Monthly	Apex	-14.55	-67.55	Monsoon	69000	1976	1979	2.65045	15.3356	nan	2.37017	nan	nan	0.246048
	Argentina01	BERMEJO	ZANJA DEL TIGRE	3268150	Monthly	Upstream of apex	-23.1	-64.22	Monsoon	24931.2	1940	1980	3.05581	58.5151	nan	2.91857	nan	nan	0.437453
	Kazakhstan05	BOGHAZ	KZIL-KESEK	2911535	Monthly	Upstream of apex	47.87	82	Cold and polar	627	1977	1987	3.25118	67.6	nan	3.1119	nan	nan	1.1828
	Russia12	BUJUNDA	3.8 KM DOWN UST'YA BUR	2998520	Monthly	Upstream of apex	61.88	153	Cold and polar	9090	1952	1988	4.55934	693.136	nan	4.53859	nan	nan	0.447964
	India11	CAUVERY	GRAND ANICUT	2854800	Monthly	Apex	10.83	78.83	Humid subtropics	74004	1971	1979	2.1738	173.256	nan	2.13529	nan	nan	0.524688
	Alaska03	CHANDALAR	NEAR VENETIE, ALAS.	4103560	Daily	Apex	67.0966	-147.187	Cold and polar	24164.7	1963	1973	4.58636	nan	11.6782	4.58602	7.80232	110.113	0.315255
	Chad05	CHARI	MAILAO	1537130	Daily	Upstream of apex	11.58	15.28	Monsoon	500000	1983	1986	4.14314	160.333	5.9205	4.12081	3.7357	18.0375	0.81729
	Chad05	CHARI	NDJAMENA(FORT LAMY)	1537100	Daily	Mid fan	12.12	15.03	Monsoon	600000	1976	1991	3.22204	119.655	5.91619	3.14334	2.9156	14.1224	0.533059
	Pakistan07	CHENAB	AKHNOOR	2837100	Monthly	Upstream of apex	32.9	74.75	Monsoon	22681	1968	1979	2.68003	19.4613	nan	2.48911	nan	nan	0.161102
	California19	COSUMNES	MICHIGAN BAR, CA	11335000	Daily	Upstream of apex	38.5003	-121.044	Arid	1388.23	1907	2018	2.40021	8676.06	124.467	2.37067	18.7583	140.678	0.973473
	Australia18	CULGOA	BRENDA	5204460	Daily	Mid fan	-29.029	147.31	Arid		1960	2008	2.09162	nan	47.6583	1.89988	10.9419	2520.5	1.09862
	Argentina04	DULCE	EL SAUCE (1967: EMBALSE RIO HONDO)	3274150	Monthly	Apex	-27.58	-64.5	Monsoon	20200	1925	1980	2.48188	73.4193	nan	2.23175	nan	nan	0.54164
	Iraq04	EUPHRATES	HIT	2595300	Monthly	Upstream of apex	33.63	42.82	Arid	264100	1964	1972	2.52167	14.0012	nan	2.23116	nan	nan	0.28618
	Russia12	GANGON (TRIB. BUJUNDA)	USTE	2998522	Monthly	Upstream of apex	61.88	152.98	Cold and polar	11.1	1963	1987	3.74292	413.043	nan	3.74292	nan	nan	0.472463
	Australia36	GASCOYNE	NINE MILE BRIDGE	5607200	Daily	Mid fan	-24.8276	113.769	Arid	73432	1957	2000	4.06225	nan	237.599	4.05886	51.4915	nan	1.18142
	Australia04	GILBERT	ROCKFIELDS	5109170	Daily	Upstream of apex	-18.2038	142.875	Arid	10987	1967	2012	4.65287	nan	286.799	4.65224	33.7595	56796.4	1.38882
	Bolivia06	GRANDE	ABAPO	3717600	Monthly	Apex	-18.85	-63.47	Humid subtropics	59000	1976	1979	2.63196	6.31579	nan	2.38252	nan	nan	0.3967
	Australia09	GREGORY RIVER	GREGORY DOWNS	5109110	Daily	Mid fan	-18.6421	139.253	Arid	12690	1969	2007	3.73912	2194.38	245.162	3.54124	47.1069	378.206	1.19967
	Russia12	GRYADA (TRIB. BUJUNDA)	BURKOT	2998521	Monthly	Upstream of apex	61.88	153	Cold and polar	8.5	1964	1988	3.44526	nan	nan	3.44526	nan	nan	0.363027
	China06	HUANG HE (Yellow River)	TANGLAI QU	2180711	Daily	Upstream of apex	39.1333	106.667	Monsoon	121972	1978	1997	2.05967	34.3312	8.21297	1.80623	3.53501	8.81305	0.447365
	Russia09	IKURA	BIROBIDZHAN	2906650	Daily	Apex	48.81	132.89	Cold and polar	155	1978	1987	2.88205	nan	34.9541	2.88205	12.6534	nan	0.928677
	Pakistan03	INDUS	ATTOCK	2335200	Monthly	Upstream of apex	33.9	72.25	Monsoon	265122	1973	1979	2.71524	98.2275	nan	2.45971	nan	nan	0.396842
	Pakistan01	KABUL	DAKAH	2240100	Daily	Upstream of apex	34.2333	71.0333	Monsoon	67370	1968	1980	2.49149	20.625	4.63365	2.23125	3.05855	7.82235	0.248075
	Nepal01	KARNALI	CHISAPANI	2548400	Daily	Apex	28.64	81.29	Monsoon	42890	1987	1990	2.87649	nan	23.7801	2.62409	7.47726	17.2253	0.516231
	Mongolia05	KHARKHIRAA GOL	TARIALAN	2743100	Daily	Apex	49.77	91.83	Arid	738	1978	1982	3.46734	6	1.83949	3.46734	4.92076	1.71429	0.187492
	India05	KOSI SAPT	CHATARA-KOTHU	2550600	Monthly	Apex	26.87	87.16	Monsoon	5410	1977	1985	2.82266	18.8213	nan	2.61765	nan	nan	0.19564
	Australia21	LACHLAN	BOOLIGAL	5204300	Daily	Mid fan	-33.8695	144.881	Arid	55900	1907	2008	1.9917	610.914	9.91145	1.56085	3.09638	29.0122	0.642592
	Mozambique01	LIMPOPO	CHOKWE	1896500	Monthly	Toe	-24.5	33	Humid subtropics	342000	1976	1979	4.22379	301.266	nan	4.17636	nan	nan	0.359269
	Mozambique01	LIMPOPO	COMBOMUNE	1896502	Daily	Mid fan	-23.4606	32.4333	Humid subtropics	266350	1965	1993	4.76219	nan	74.8326	4.70894	20.7184	763.451	0.987914
	Chad01	LOGONE	BONGOR	1537150	Daily	Toe	10.27	15.42	Humid subtropics	73700	1983	1986	3.56535	34.75	5.31598	3.40542	3.04283	12.3097	0.36641
	Chad01	LOGONE	LAI	1537200	Daily	Apex	9.4	16.3	Humid subtropics	56700	1983	1986	3.60436	28.1231	6.41039	3.33613	2.82471	14.2399	0.42589
	Australia20	MACQUAIRIE	OXLEY STATION	5204400	Daily	Mid fan	-31.1175	147.569	Arid	3565	1943	2008	1.45918	322.608	5.02527	0.888083	2.70127	10.1395	0.335267
	India17	MANAS	MATHANGURI	2851250	Monthly	Mid fan	26.65	90.95	Monsoon	32770	1955	1974	1990	23.3866	nan	1985	nan	nan	0.425985
	Australia35	MARILLANA	FLAT ROCKS	5607080	Daily	Upstream of apex	-22.7216	118.973	Arid	1369.5	1967	2007	4.57043	nan	2273.94	4.56128	164.674	24496.7	2.29939
	Tanzania01	MBARALI	IGAWA	1286200	Daily	Apex	-8.78333	34.3667	Humid subtropics	1546	1955	1983	2.57842	70.6564	14.0847	2.27196	6.75841	18.7395	0.539079
	New Mexico01	MIMBRES	FAYWOOD, NM	8477500	Daily	Upstream of apex	32.5861	-107.919	Arid	1139.59	1930	1968	2.21935	nan	177.224	1.94731	42.9183	232.945	1.1751
	Australia03	MITCHELL	KOOLATAH	5109200	Daily	Mid fan	-15.9509	142.377	Humid subtropics	45872	1972	2012	4.44167	8590.33	27.6482	4.43078	14.3823	676.6	0.705063
	India07	NARAYANI GANDAK	DEVGHAT	2549500	Monthly	Upstream of apex	27.71	84.43	Monsoon	31100	1963	1993	3.21579	31.4528	nan	3.04344	nan	nan	0.170754
	Alaska08	NENANA	NEAR REX, ALAS.	4103620	Daily	Upstream of apex	64.2176	-149.28	Cold and polar	6345.5	1964	1968	3.20329	58.1821	8.46571	3.06054	5.2389	30.9847	0.502804
	Mali01	NIGER	AKKA	1134600	Daily	Toe	15.4	-4.23	Monsoon		1987	1990	2.79217	39.5	2.97175	2.71225	1.43509	6.92982	1.15548
	Mali01	NIGER	KE-MACINA	1134400	Daily	Mid fan	13.95	-5.37	Monsoon	141000	1953	1992	3.47146	163.25	4.31586	3.44707	2.73956	8.89108	0.557253
	Mali01	NIGER	KIRANGO AVAL	1134250	Daily	Apex	13.7167	-6.05	Monsoon	137000	1925	2001	3.3741	186.849	5.45692	3.33226	82.2267	13.4078	0.344209
	Mali01	NIGER	NANTAKA (MOPTI)	1134500	Daily	Mid fan	14.53	-4.22	Monsoon	281600	1922	2001	2.64156	82.5424	4.33543	2.59616	2.16864	6.41414	0.513274
	Mali01	NIGER	TILEMBEYA	1134460	Daily	Mid fan	14.15	-4.98	Monsoon	143300	1922	1992	3.13871	96.8571	3.68638	3.09017	2.95062	8.84514	0.287982
	Australia12	NORMAN	STRATHPARK	5109160	Daily	Upstream of apex	-19.5436	143.262	Arid	285	1969	1988	5.27986	nan	134.036	5.27986	48.575	nan	1.77682
	Botswana01	OKAVANGO	MOHEMBO/MTAEMBO	1357100	Daily	Upstream of apex	-18.2833	21.8	Monsoon	410000	1974	2001	2.02311	7.48243	3.28949	1.58243	1.75565	3.97286	0.255572
	California12	PANOCHE	SILVER	11255500	Daily	Apex	36.6189	-120.673	Arid	758.867	1949	1970	4.45276	nan	833.184	4.45276	92.3503	nan	2.22504
	Bolivia09	PILCOMAYO	LA PAZ	3268500	Monthly	Mid fan	-22.45	-62.37	Monsoon	96000	1941	2015	3.07519	92.9168	nan	2.96926	nan	nan	0.487358
	Bolivia09	PILCOMAYO	VILLA MONTES	3768500	Monthly	Upstream of apex	-21.25	-63.47	Monsoon	81506	1976	1979	2.90252	41.1688	nan	2.75282	nan	nan	0.488512
	Mozambique06	PUNGOE	BUE-MARIA	1894400	Daily	Apex	-19.0253	34.18	Humid subtropics	15300	1953	1981	2.75839	199.096	34.5936	2.54398	11.2917	35.4996	0.638125
	Iran06	QOM	ABBAS-ABAD	2428200	Daily	Upstream of apex	34.07	50.6	Arid	10286	1977	1983	3.41889	nan	24.1737	3.30478	7.77351	66.0701	1.18686
	Thailand02	QUAE YAI	SRINAGARIND DAM	2964999	Monthly	Upstream of apex	14.4	99.14	Monsoon	10880	1952	1989	2.6621	33.9615	nan	2.46917	nan	nan	0.375636
	Brazil01	RIO PARAGUAY	CACERES	3666050	Daily	Upstream of apex	-16.0758	-57.7022	Rainforest	32774	1965	2007	1.88044	11.9238	4.90551	1.40865	2.01722	5.29067	0.343244
	Brazil04	RIO PARAGUAY	PORTO ESPERANCA	3667020	Daily	Apex	-19.6006	-57.4372	Rainforest	363500	1963	1995	1.38468	8.48685	4.4275	0.763511	1.08138	3.05675	0.493213
	Argentina19	RIO PARANA	CORRIENTES	3265300	Daily	Mid fan	-27.97	-58.85	Rainforest	1950000	1904	2014	1.22823	6.12439	3.50217	0.450446	1.13742	3.1122	0.244642
	Argentina19	RIO PARANA	ISLA PATI (BRAZO SECUNDARIO)	3265815	Daily	Toe	-29.48	-59.55	Rainforest		1975	1990	1.21749	4.23744	2.17418	0.340371	1.11638	2.15748	0.158952
	Argentina19	RIO PARANA	POSADAS	3264500	Daily	Upstream of apex	-27.37	-55.88	Rainforest	975000	1901	2000	1.34798	7.798	4.27592	0.600698	1.55483	3.56233	0.277456
	Brazil06	RIO SAO LOURENCO	SAO JOSE DO BORIREU	3666505	Monthly	Mid fan	-16.9253	-56.2236	Rainforest		1968	1978	1.51191	3.35702		0.978007	nan	nan	0.0436986
	Brazil02	RIO TAQUARI	COXIM	3667300	Daily	Apex	-18.5078	-54.7619	Rainforest	27040	1966	2007	1.42625	9.49701	4.63951	0.677888	1.76037	3.47881	0.364498
	Argentina02	ROSARIO (HORCONES)	TOMA DE OVANDO	3265040	Monthly	Mid fan	-25.4	-64.03	Monsoon	2400	1948	1967	3.1807	29.8889		2.93522	nan	nan	0.4486
	California10	SAN JOAQUIN	FRIANT	11251000	Daily	Apex	36.9844	-119.723	Arid	4340.82	1907	2018	2.62436	97	16.4141	2.35794	9.34028	16.1267	0.663093
	Afghanistan02	SAR-E PUL	ASIABAD	2218480	Daily	Upstream of apex	36.2	65.95	Arid	6950	1964	1978	1.57947	31.1111	14.1686	0.959418	5.89312	11.1035	0.708699
	Botswana01	SHASHE	SHASHE BRIDGE	1357200	Daily	Toe	-20.0167	23.3833	Arid		1970	1990	2.75712	nan	8.48732	2.63908	2.64203	nan	1.05163
	Malawi01	SHIRE	CHIROMO	1992900	Monthly	Toe	-16.55	35.13	Temperate	149500	1953	1981	1.42487	6.15657	nan	0.80362	nan	nan	0.30689
	Afghanistan11	SHIRIN TAGAW	PATA BABA	2218400	Daily	Upstream of apex	36.5833	64.8667	Arid	11775	1964	1978	2.98245	235.088	34.2576	2.73983	15.7434	38.4615	0.590551
	Alaska08	TANANA	NEAR NENANA, ALAS.	4103600	Daily	Toe	64.5648	-149.094	Cold and polar	66304	1962	2018	2.4753	28.5937	7.42107	2.20533	3.06472	8.11272	0.230228
	Arizona01	TRUXTON WASH	NEAR VALETINE AZ	9404343	Daily	Upstream of apex	35.3842	-113.657	Arid	984.972	1993	2018	2.55051	nan	269.739	2.35571	89.2948	1803.78	0.868592
	Argentina21	TUNUNYAN	VALLE DE UCO	3275250	Daily	Apex	-33.78	-69.25	Temperate	2380	1954	2015	2.23129	20.2885	7.51536	1.81665	3.34747	9.27527	0.401855
	Somalia01	WABI SHEBELE	AFGOI	1878100	Monthly	Mid fan	2.17	45.09	Arid	278000	1951	1979	1.90847	112	nan	1.73845	nan	nan	0.079934
	Somalia01	WABI SHEBELE	BALAD	1878200	Monthly	Mid fan	2.37	45.42	Arid	272700	1951	1978	1.84159	23.2653	nan	1.68939	nan	nan	0.129249
	Somalia01	WABI SHEBELE	BELET UEN	1878500	Monthly	Upstream of apex	4.78	45.2	Arid	211800	1951	1979	2.15503	43	nan	1.97002	nan	nan	0.330966
	Somalia01	WABI SHEBELE	BULO BURTI	1878400	Monthly	Upstream of apex	3.87	45.67	Arid	231000	1951	1978	2.08199	30.25	nan	1.95199	nan	nan	0.262961
	Somalia01	WABI SHEBELE	MAHADDEI UEN	1878300	Monthly	Mid fan	3	45.53	Arid	255300	1951	1979	2.03724	25.6667	nan	1.88202	nan	nan	0.181414
	Alaska11	WOOD	NEAR FAIRBANK AK	15514500	Daily	Mid fan	64.435	-148.213	Cold and polar	2128.97	1968	1978	2.71217	67.4286	10.1127	2.51789	7.2524	20.3216	0.224215
	Niger01	YOBE	DAMASAK	1837104	Daily	Mid fan	13.2778	12.6211	Monsoon	82562	1963	1978	2.33193	313.296	2.65402	2.32678	2.2362	2.88089	0.140593
	Niger01	YOBE	GEIDAM	1837106	Daily	Upstream of apex	12.9899	11.9705	Monsoon	67340	1958	2005	3.10228	428.783	5.00495	3.09903	2.16229	5.63528	0.436785
	Niger01	YOBE	YAU	1837101	Daily	Toe	13.5622	13.2348	Monsoon	84140	1963	1978	2.16338	111.759	2.43881	2.15892	2.0998	2.09033	0.120171
	Niger01	YOBE KOMADOUGOU	BAGARA DIFFA	1237500	Daily	Mid fan	13.28	12.6	Arid	115000	1976	1980	3.0234	nan	3.31303	3.0234	3.221	24	0.0247436
	Namibia01	ZAMBEZI	SENANGA	1591001	Daily	Upstream of apex	-16.1167	23.25	Humid subtropics	284538	1947	2004	2.14908	10.3971	3.15083	1.82786	1.95258	4.05795	0.240403
	Fan names from Hartley et al., (2010).
	Additional 17 gauging stations on 16 fans are available, but were omitted from this study due to the presence of dams that may significantly alter their discharge.

## Sheet: G47471
Hansford, M.R., and Plink-Björklund, P. 2020, River discharge variability as the link between climate and fluvial fan formation: Geology, v. 48, https://doi.org/10.1130/G47471.1
